# Supplementary material for: Synergistics of Carboxymethyl Chitosan and Mangosteen Extract as Enhancing Moisturizing, Antioxidant, Antibacterial, and Deodorizing Properties in Emulsion Cream
Source: MDPI journal article supplement (doi:10.3390/polym14010178), 2022-01-03
Supplement: s1 [file s1]

## Supplementary Data

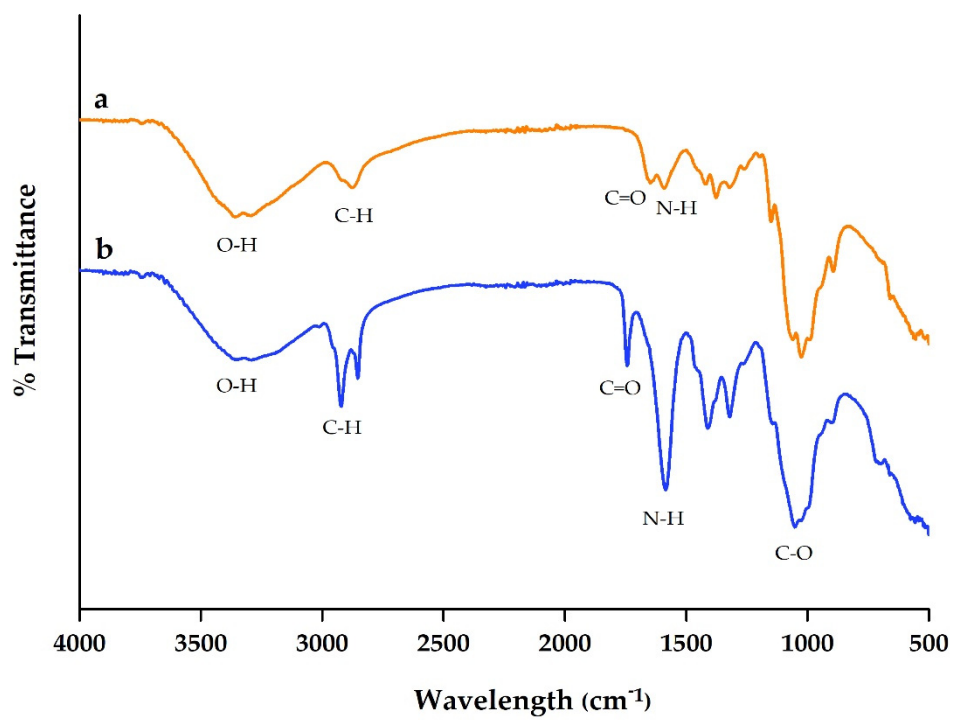

**Figure S1.** FT-IR spectra of (a) high Mw native chitosan; (b) H-CMCH.

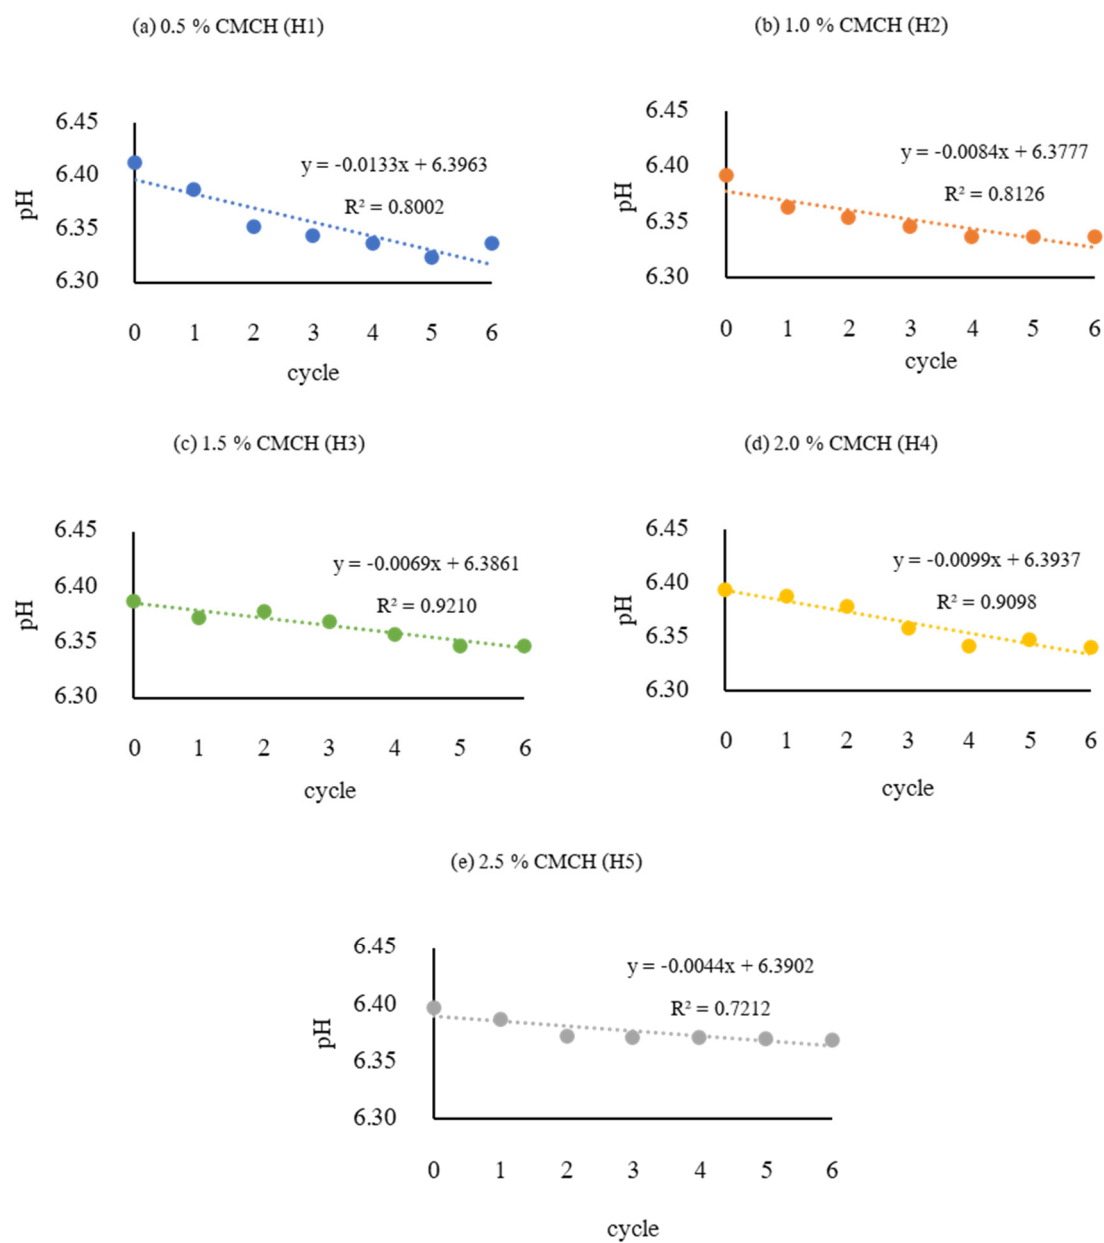

**Figure S2.** pH of deodorant creams adding H-CMCH by heating-cooling cycle for up to 6 cycles.

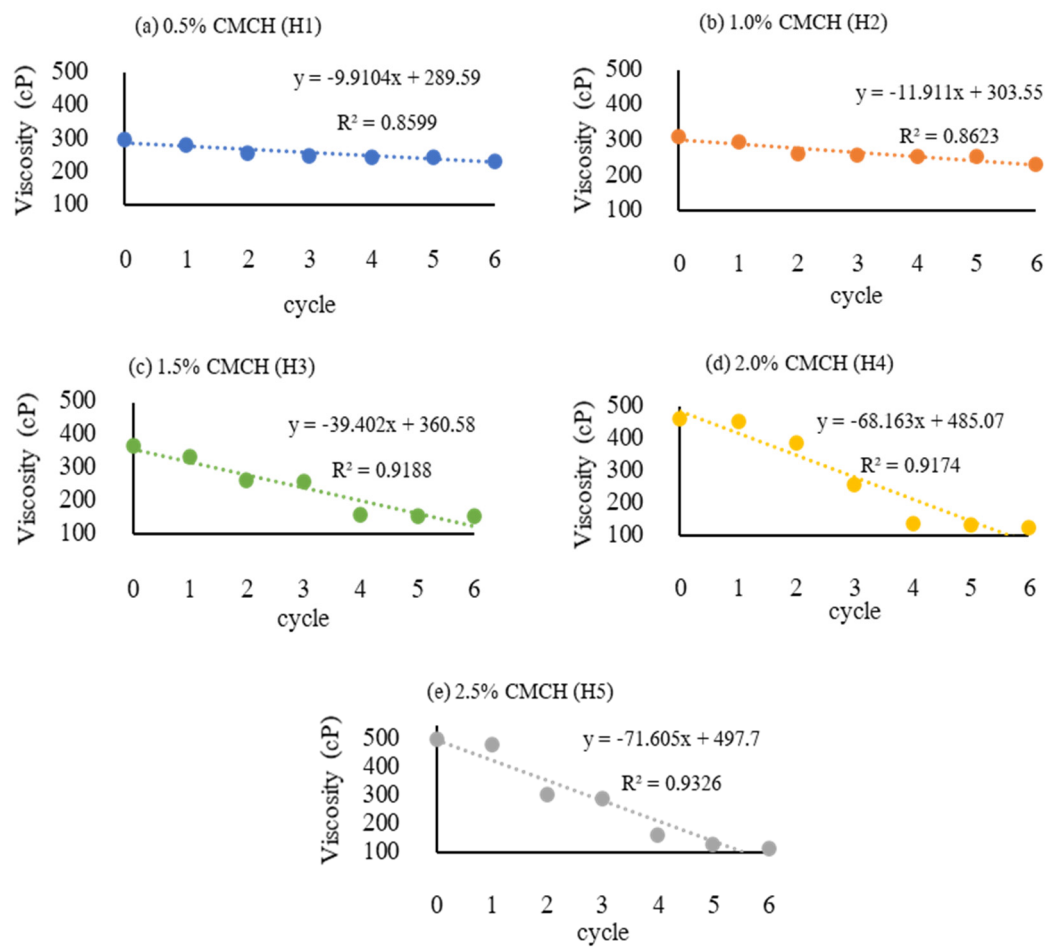

**Figure S3.** Viscosity of deodorant creams adding H-CMCH by heating-cooling cycle for up to 6 cycles.

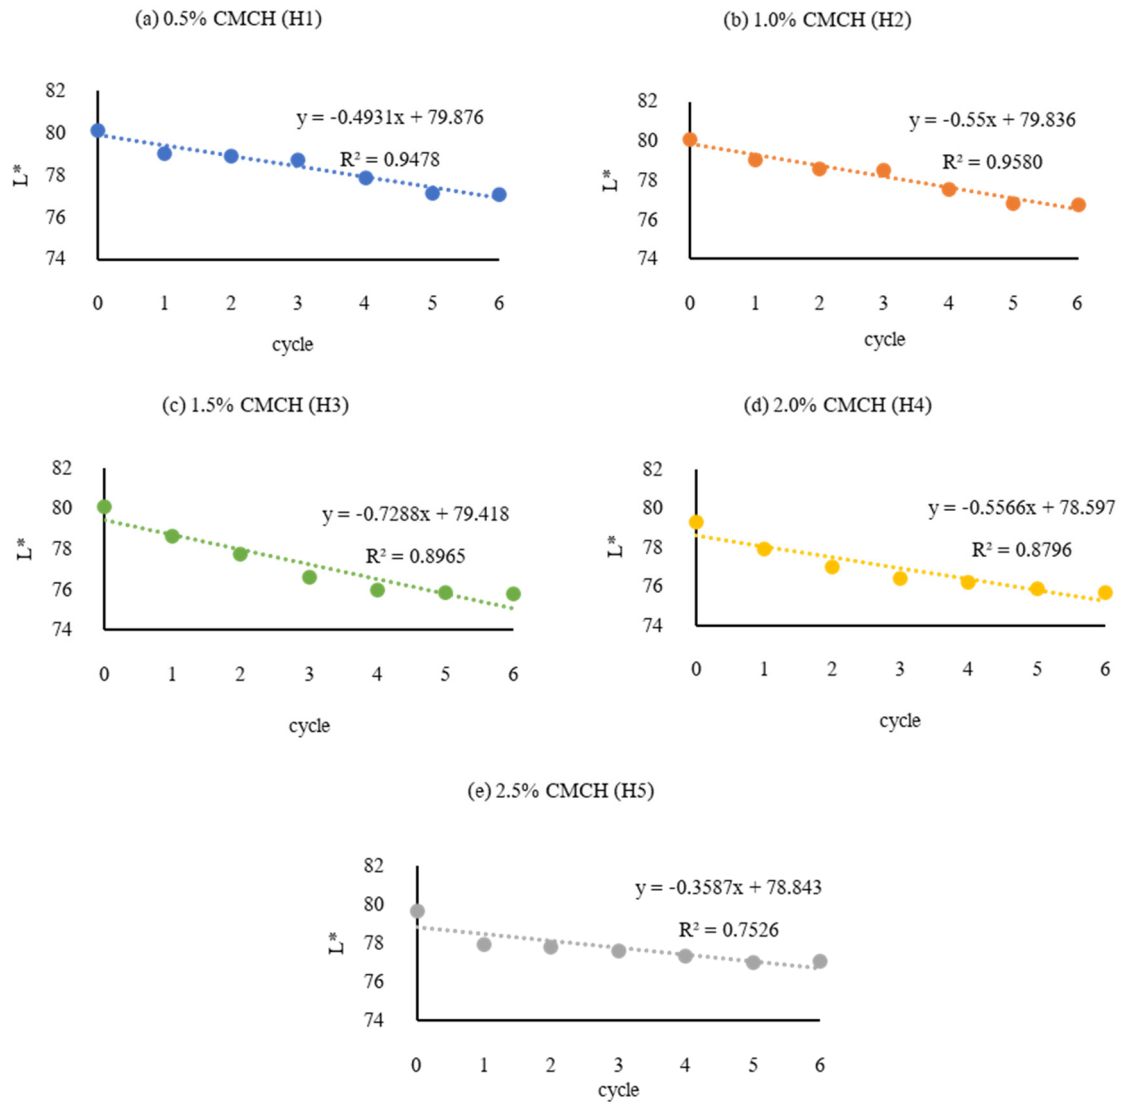

**Figure S4.** Lightness ( $L^*$ ) of deodorant creams adding H-CMCH by heating-cooling cycle for up to 6 cycles.

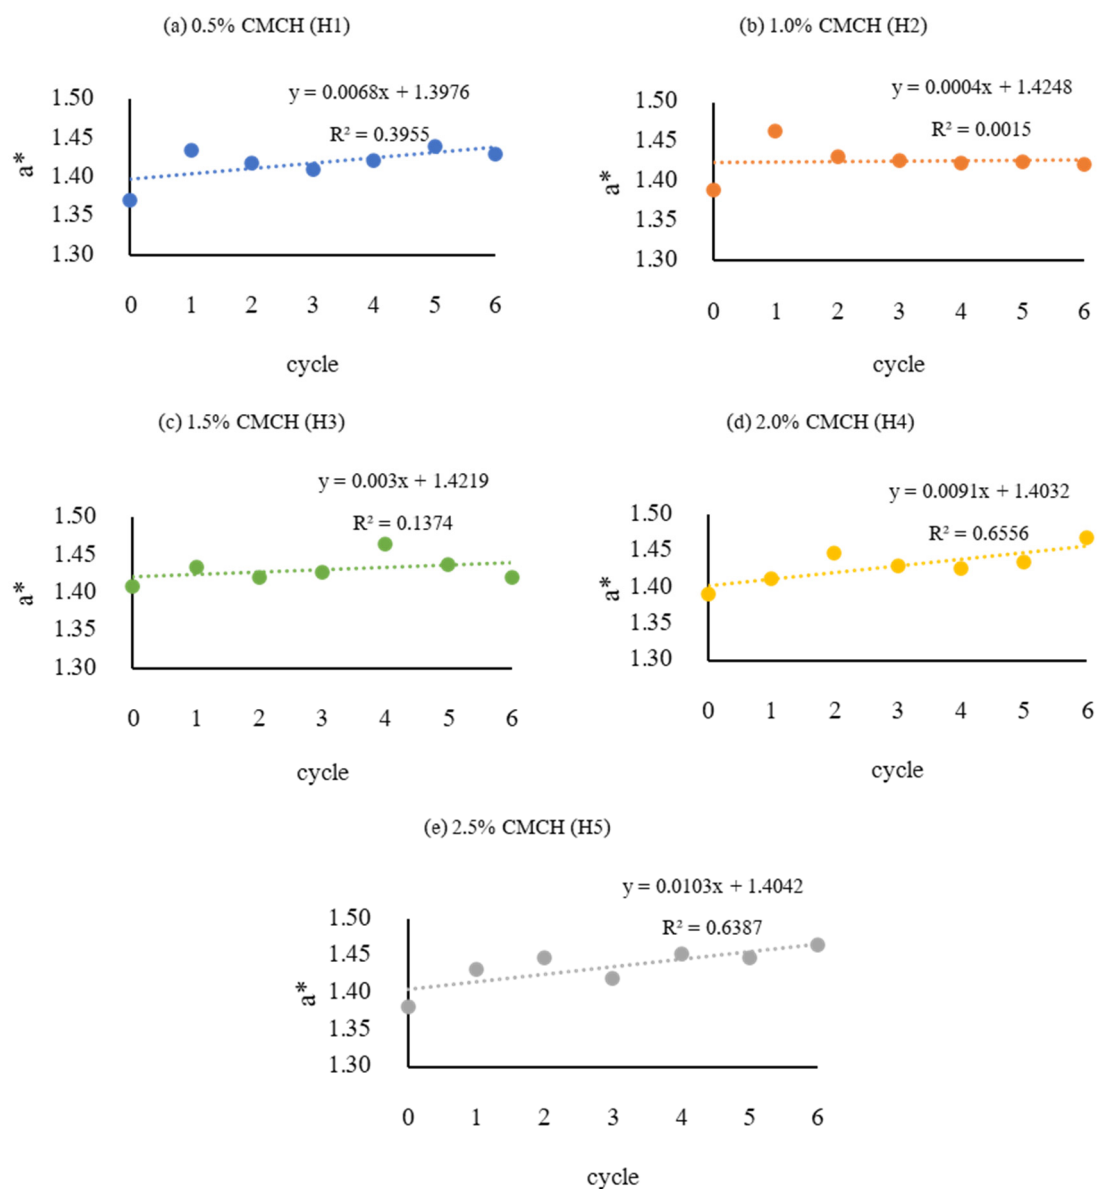

**Figure S5.** Red/green coordinate ( $a^*$ ) of deodorant creams adding H-CMCH by heating-cooling cycle for up to 6 cycles.

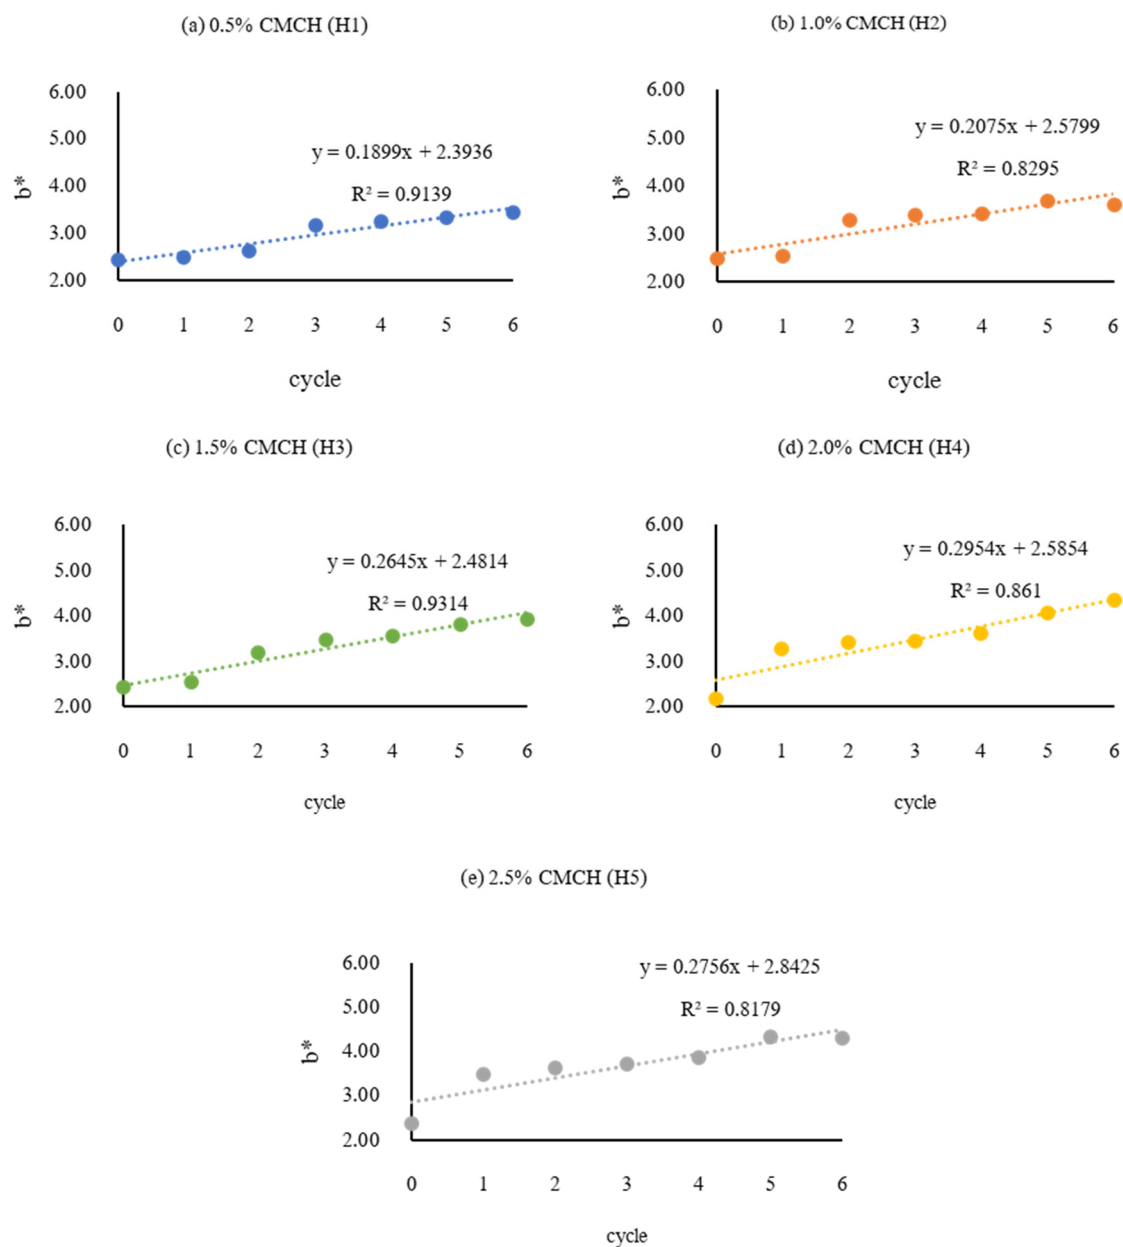

**Figure S6.** Yellow/blue coordinate ( $b^*$ ) of deodorant creams adding H-CMCH by heating-cooling cycle for up to 6 cycles.
